# Supplementary material for: Intensified hand-hygiene campaign including soap-and-water wash may prevent acute infections in office workers, as shown by a recognized-exposure -adjusted analysis of a randomized trial
Source: Springer Nature journal article supplement (doi:10.1186/s12879-016-2157-z), 2017-01-09

## Additional file 1. CONSORT 2010 Flow Diagram

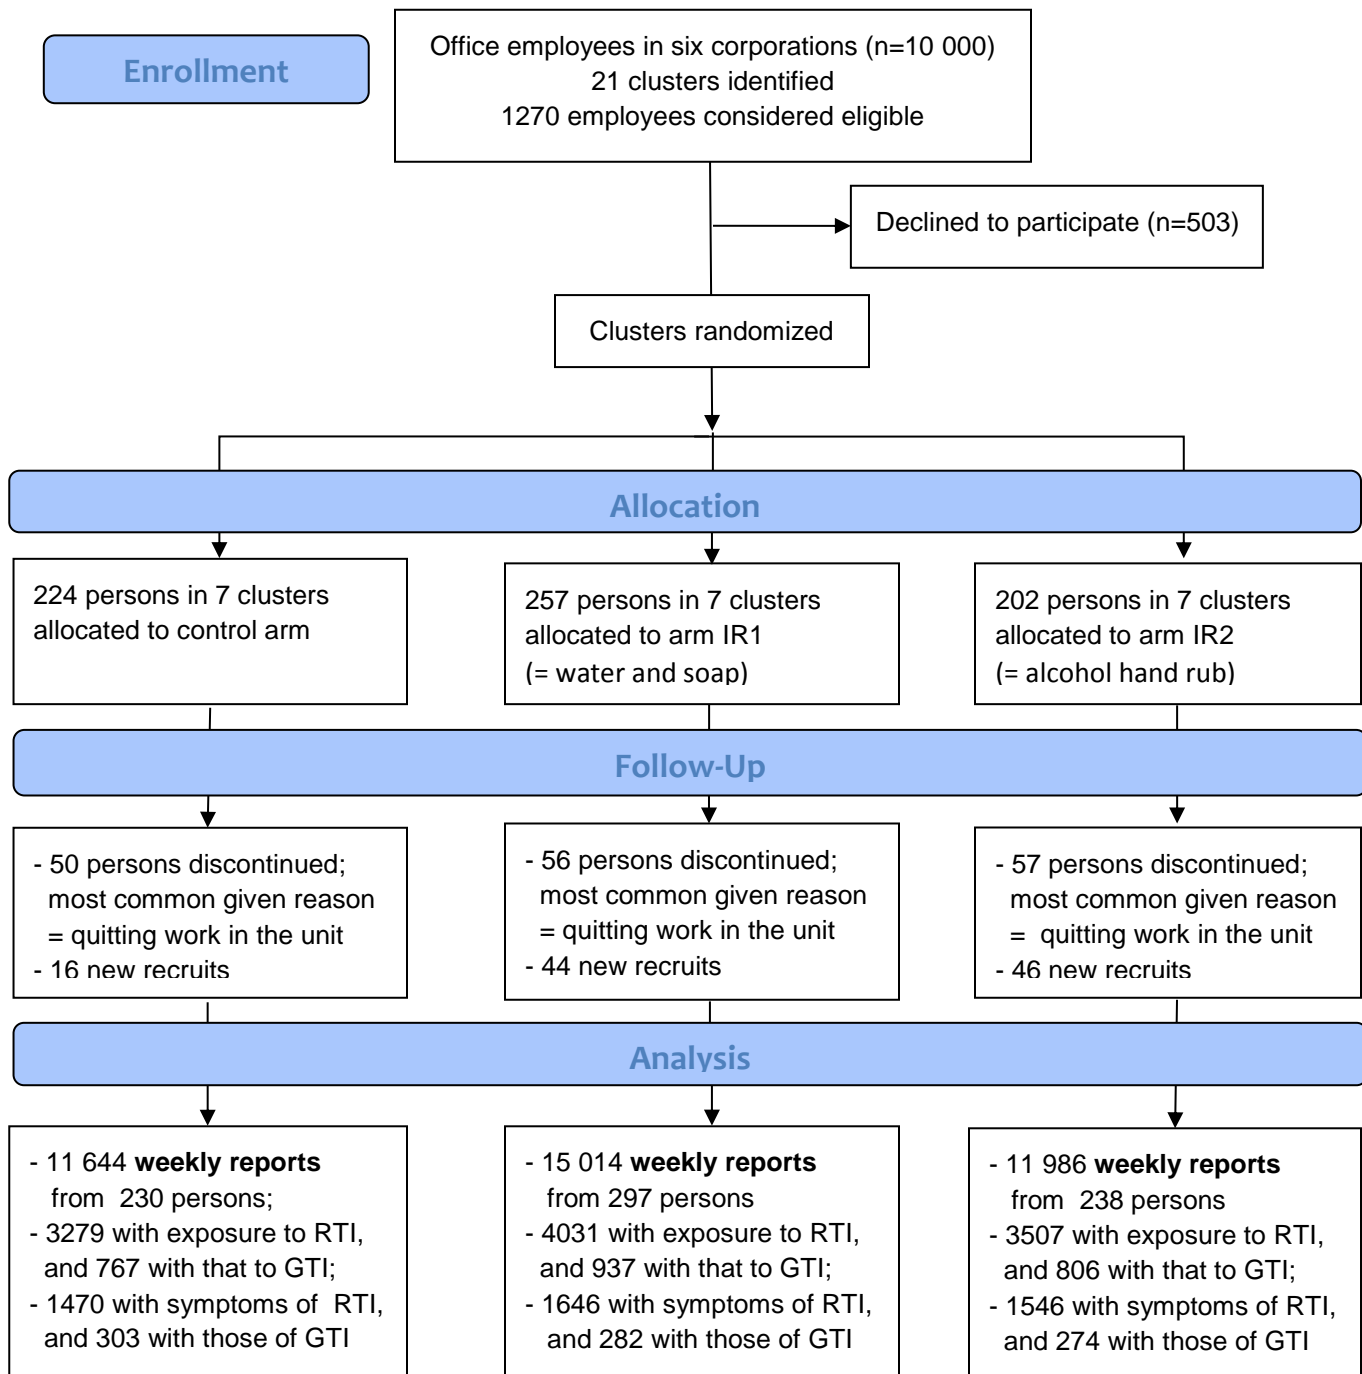

Supplement: MOESM1 [file 11987016]
